# Supplementary material for: Tuning the properties of graphene quantum dots by passivation
Source: Royal Society of Chemistry journal article supplement (doi:10.1039/d2cp03990g), 2022-01-01
Supplement: d2cp03990g1.pdf [file d2cp03990g1.pdf]

# Supporting Information

## Tuning Properties of Graphene Quantum Dots by Passivation

Priya Rani,<sup>1</sup> Ranjeet Dalal,<sup>1</sup> Sunita Srivastava,<sup>2,3,\*</sup> and Kumar Tankeshwar<sup>2,3</sup>

<sup>1</sup>*Department of Physics, Guru Jambheshwar University of Science and Technology, Hisar, India-125001*

<sup>2</sup>*Department of Physics, Panjab University, Chandigarh, India-160014*

<sup>3</sup>*Department of Physics & Astrophysics, Central University of Haryana, Mahendergarh, India-123031*

**Table S1. Absorption energies, wavelengths, and oscillator strengths of  $C_{24}H_{12}$  and  $C_{24}F_{12}$  GQDs for the first 25 states.**

| State | Absorption energy (eV) |                | Wavelength (nm) |                | Oscillator Strength (f) |                |
|-------|------------------------|----------------|-----------------|----------------|-------------------------|----------------|
|       | $C_{24}H_{12}$         | $C_{24}F_{12}$ | $C_{24}H_{12}$  | $C_{24}F_{12}$ | $C_{24}H_{12}$          | $C_{24}F_{12}$ |
| 1     | 3.27                   | 3.10           | 378.89          | 399.52         | 0.0000                  | 0.0000         |
| 2     | 3.52                   | 3.36           | 352.06          | 368.55         | 0.0000                  | 0.0000         |
| 3     | 4.12                   | 3.94           | 300.28          | 314.66         | 0.9455                  | 0.9462         |
| 4     | 4.13                   | 3.95           | 300.25          | 314.64         | 0.9439                  | 0.9455         |
| 5     | 4.43                   | 4.31           | 279.80          | 287.69         | 0.0000                  | 0.0000         |
| 6     | 4.43                   | 4.31           | 279.79          | 287.69         | 0.0000                  | 0.0000         |
| 7     | 4.46                   | 4.38           | 277.88          | 282.78         | 0.0000                  | 0.0000         |
| 8     | 4.53                   | 4.39           | 273.51          | 282.27         | 0.0000                  | 0.0000         |
| 9     | 4.68                   | 4.46           | 264.85          | 277.82         | 0.0000                  | 0.0000         |
| 10    | 4.77                   | 4.58           | 259.67          | 270.87         | 0.0000                  | 0.0000         |
| 11    | 4.77                   | 4.58           | 259.66          | 270.86         | 0.0000                  | 0.0000         |
| 12    | 5.06                   | 4.72           | 244.95          | 262.56         | 0.0000                  | 0.0000         |
| 13    | 5.06                   | 4.72           | 244.94          | 262.54         | 0.0000                  | 0.0000         |
| 14    | 5.16                   | 4.92           | 239.88          | 252.21         | 0.0000                  | 0.0000         |
| 15    | 5.29                   | 4.96           | 234.24          | 249.90         | 0.0000                  | 0.0000         |
| 16    | 5.29                   | 4.96           | 234.24          | 249.88         | 0.0000                  | 0.0000         |
| 17    | 5.47                   | 5.46           | 226.50          | 227.23         | 0.0000                  | 0.0000         |
| 18    | 5.47                   | 5.46           | 226.49          | 227.23         | 0.0000                  | 0.0000         |
| 19    | 5.63                   | 5.48           | 220.20          | 226.05         | 0.0000                  | 0.0000         |
| 20    | 5.98                   | 5.76           | 207.18          | 215.28         | 0.0000                  | 0.0297         |
| 21    | 6.08                   | 5.76           | 203.73          | 215.27         | 0.0186                  | 0.0295         |
| 22    | 6.08                   | 5.83           | 203.72          | 212.79         | 0.0187                  | 0.0000         |
| 23    | 6.11                   | 5.87           | 202.88          | 211.34         | 0.0000                  | 0.1119         |
| 24    | 6.11                   | 5.87           | 202.88          | 211.34         | 0.0000                  | 0.1117         |
| 25    | 6.21                   | 5.97           | 199.58          | 207.70         | 0.3839                  | 0.0000         |

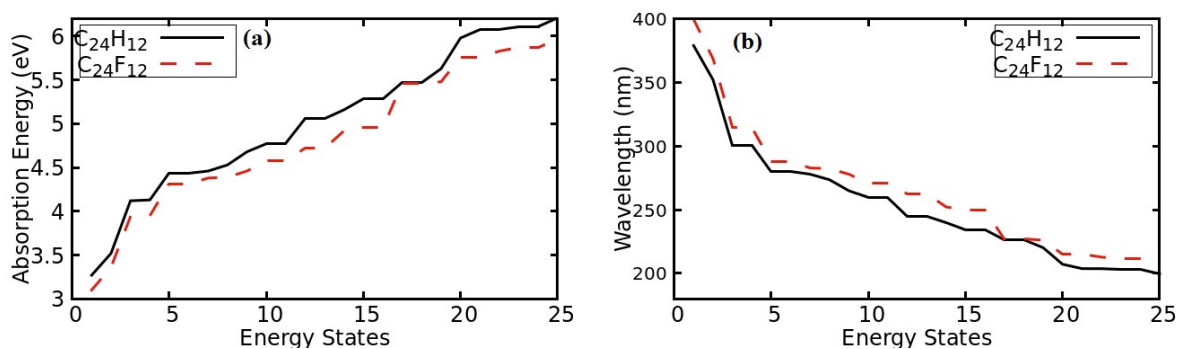

**Fig S1. (a) Absorption energy and (b) wavelength of the first 25 energy states of  $C_{24}H_{12}$  and  $C_{24}F_{12}$  GQDs.**

**Table S2. Absorption energies, wavelengths, and oscillator strengths of  $C_{42}H_{18}$  for the first 25 states.**

| State | Absorption energy (eV) |                | Wavelength (nm) |                | Oscillator Strength (f) |                |
|-------|------------------------|----------------|-----------------|----------------|-------------------------|----------------|
|       | $C_{42}H_{18}$         | $C_{42}F_{18}$ | $C_{42}H_{18}$  | $C_{42}F_{18}$ | $C_{42}H_{18}$          | $C_{42}F_{18}$ |
| 1     | 2.93                   | 2.79           | 423.01          | 444.34         | 0.0000                  | 0.0023         |
| 2     | 3.08                   | 2.93           | 402.28          | 422.79         | 0.0000                  | 0.0184         |
| 3     | 3.36                   | 3.33           | 368.54          | 372.88         | 0.0000                  | 0.9380         |
| 4     | 3.37                   | 3.33           | 368.40          | 372.18         | 0.0000                  | 0.9340         |
| 5     | 3.46                   | 3.37           | 358.12          | 367.59         | 1.0609                  | 0.1181         |
| 6     | 3.46                   | 3.42           | 358.10          | 362.75         | 1.0612                  | 0.0832         |
| 7     | 3.64                   | 3.61           | 340.31          | 343.36         | 0.0001                  | 0.0013         |
| 8     | 3.64                   | 3.66           | 340.19          | 338.38         | 0.0003                  | 0.0374         |
| 9     | 3.89                   | 4.00           | 318.52          | 309.75         | 0.0000                  | 0.0018         |
| 10    | 4.08                   | 4.01           | 304.13          | 309.30         | 0.0000                  | 0.0014         |
| 11    | 4.08                   | 4.06           | 304.04          | 305.06         | 0.0000                  | 0.0027         |
| 12    | 4.25                   | 4.10           | 291.77          | 302.67         | 0.0004                  | 0.0017         |
| 13    | 4.25                   | 4.15           | 291.75          | 299.03         | 0.0004                  | 0.0005         |
| 14    | 4.32                   | 4.19           | 287.18          | 296.03         | 0.0000                  | 0.0003         |
| 15    | 4.39                   | 4.19           | 282.45          | 295.91         | 0.0000                  | 0.0080         |
| 16    | 4.40                   | 4.20           | 281.68          | 295.23         | 0.0000                  | 0.0000         |
| 17    | 4.44                   | 4.22           | 278.98          | 294.07         | 0.0009                  | 0.0063         |
| 18    | 4.45                   | 4.27           | 278.87          | 290.58         | 0.0009                  | 0.0114         |
| 19    | 4.48                   | 4.28           | 276.53          | 289.93         | 0.0000                  | 0.0082         |
| 20    | 4.48                   | 4.29           | 276.50          | 288.91         | 0.0000                  | 0.0014         |
| 21    | 4.54                   | 4.31           | 272.90          | 288.00         | 0.0000                  | 0.0037         |
| 22    | 4.57                   | 4.34           | 271.33          | 285.76         | 0.0000                  | 0.0000         |
| 23    | 4.63                   | 4.34           | 267.77          | 285.54         | 0.0000                  | 0.0142         |
| 24    | 4.63                   | 4.39           | 267.73          | 282.64         | 0.0000                  | 0.0005         |
| 25    | 4.67                   | 4.41           | 265.73          | 280.85         | 0.0000                  | 0.0004         |

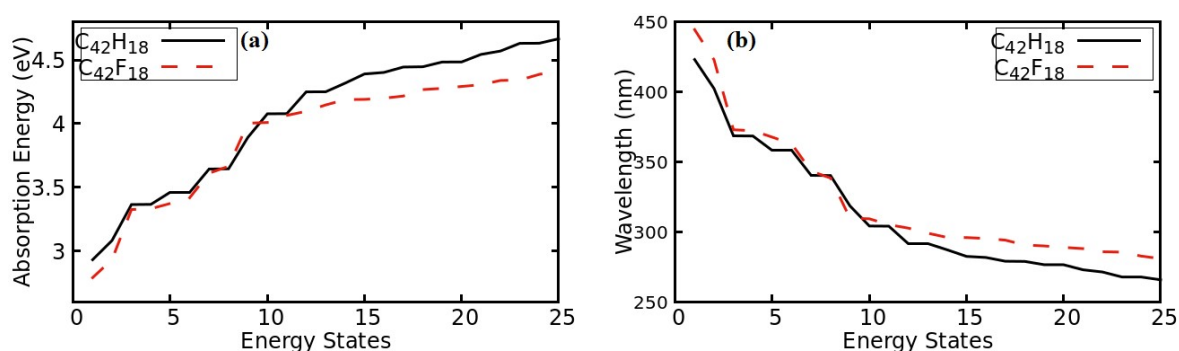

**Fig S2. (a) Absorption energy and (b) wavelength of the first 25 energy states of  $C_{42}H_{18}$  and  $C_{42}F_{18}$  GQDs.**

**Table S3. Absorption energies, wavelengths, and oscillator strengths of  $C_{54}H_{18}$  and  $C_{54}F_{18}$  GQDs for the first 25 states.**

| State | Absorption energy (eV) |                | Wavelength (nm) |                | Oscillator Strength (f) |                |
|-------|------------------------|----------------|-----------------|----------------|-------------------------|----------------|
|       | $C_{54}H_{18}$         | $C_{54}F_{18}$ | $C_{54}H_{18}$  | $C_{54}F_{18}$ | $C_{54}H_{18}$          | $C_{54}F_{18}$ |
| 1     | 2.27                   | 2.16           | 546.57          | 574.48         | 0.0000                  | 0.0000         |
| 2     | 2.43                   | 2.33           | 509.38          | 532.00         | 0.0000                  | 0.0000         |
| 3     | 2.87                   | 2.74           | 432.28          | 452.05         | 1.3887                  | 1.3548         |
| 4     | 2.87                   | 2.74           | 432.27          | 452.04         | 1.3877                  | 1.3542         |
| 5     | 3.17                   | 3.05           | 391.45          | 406.04         | 0.0000                  | 0.0000         |
| 6     | 3.17                   | 3.05           | 391.44          | 406.04         | 0.0000                  | 0.0000         |
| 7     | 3.19                   | 3.08           | 389.19          | 401.95         | 0.0000                  | 0.0000         |
| 8     | 3.26                   | 3.14           | 380.62          | 394.57         | 0.0000                  | 0.0000         |
| 9     | 3.30                   | 3.16           | 375.99          | 392.88         | 0.0000                  | 0.0000         |
| 10    | 3.36                   | 3.21           | 369.41          | 386.04         | 0.0000                  | 0.0000         |
| 11    | 3.36                   | 3.21           | 369.40          | 386.02         | 0.0000                  | 0.0000         |
| 12    | 3.53                   | 3.27           | 350.84          | 378.83         | 0.0000                  | 0.0000         |
| 13    | 3.53                   | 3.27           | 350.80          | 378.82         | 0.0000                  | 0.0000         |
| 14    | 3.67                   | 3.50           | 337.57          | 353.73         | 0.0000                  | 0.0000         |
| 15    | 3.74                   | 3.61           | 331.74          | 343.66         | 0.0000                  | 0.0000         |
| 16    | 3.74                   | 3.61           | 331.73          | 343.66         | 0.0000                  | 0.0000         |
| 17    | 3.88                   | 3.86           | 319.58          | 321.37         | 0.0000                  | 0.0000         |
| 18    | 3.90                   | 3.89           | 317.53          | 318.72         | 0.0000                  | 0.0000         |
| 19    | 3.93                   | 3.89           | 315.82          | 318.70         | 0.0314                  | 0.0000         |
| 20    | 3.93                   | 3.91           | 315.81          | 317.16         | 0.0316                  | 0.0039         |
| 21    | 3.96                   | 3.91           | 312.82          | 317.15         | 0.0006                  | 0.0039         |
| 22    | 3.96                   | 3.96           | 312.81          | 313.18         | 0.0005                  | 0.0000         |
| 23    | 4.02                   | 3.97           | 308.39          | 312.44         | 0.0000                  | 0.0000         |
| 24    | 4.02                   | 3.99           | 308.36          | 310.61         | 0.0000                  | 0.0021         |
| 25    | 4.13                   | 3.99           | 300.16          | 310.57         | 0.0000                  | 0.0024         |

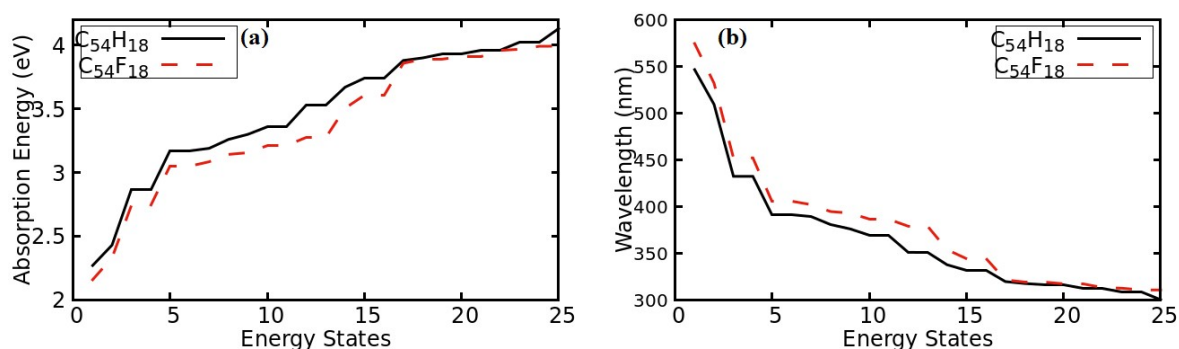

**Fig S3. (a) Absorption energy and (b) wavelength of the first 25 energy states  $C_{54}H_{18}$  and  $C_{54}F_{18}$  GQDs.**

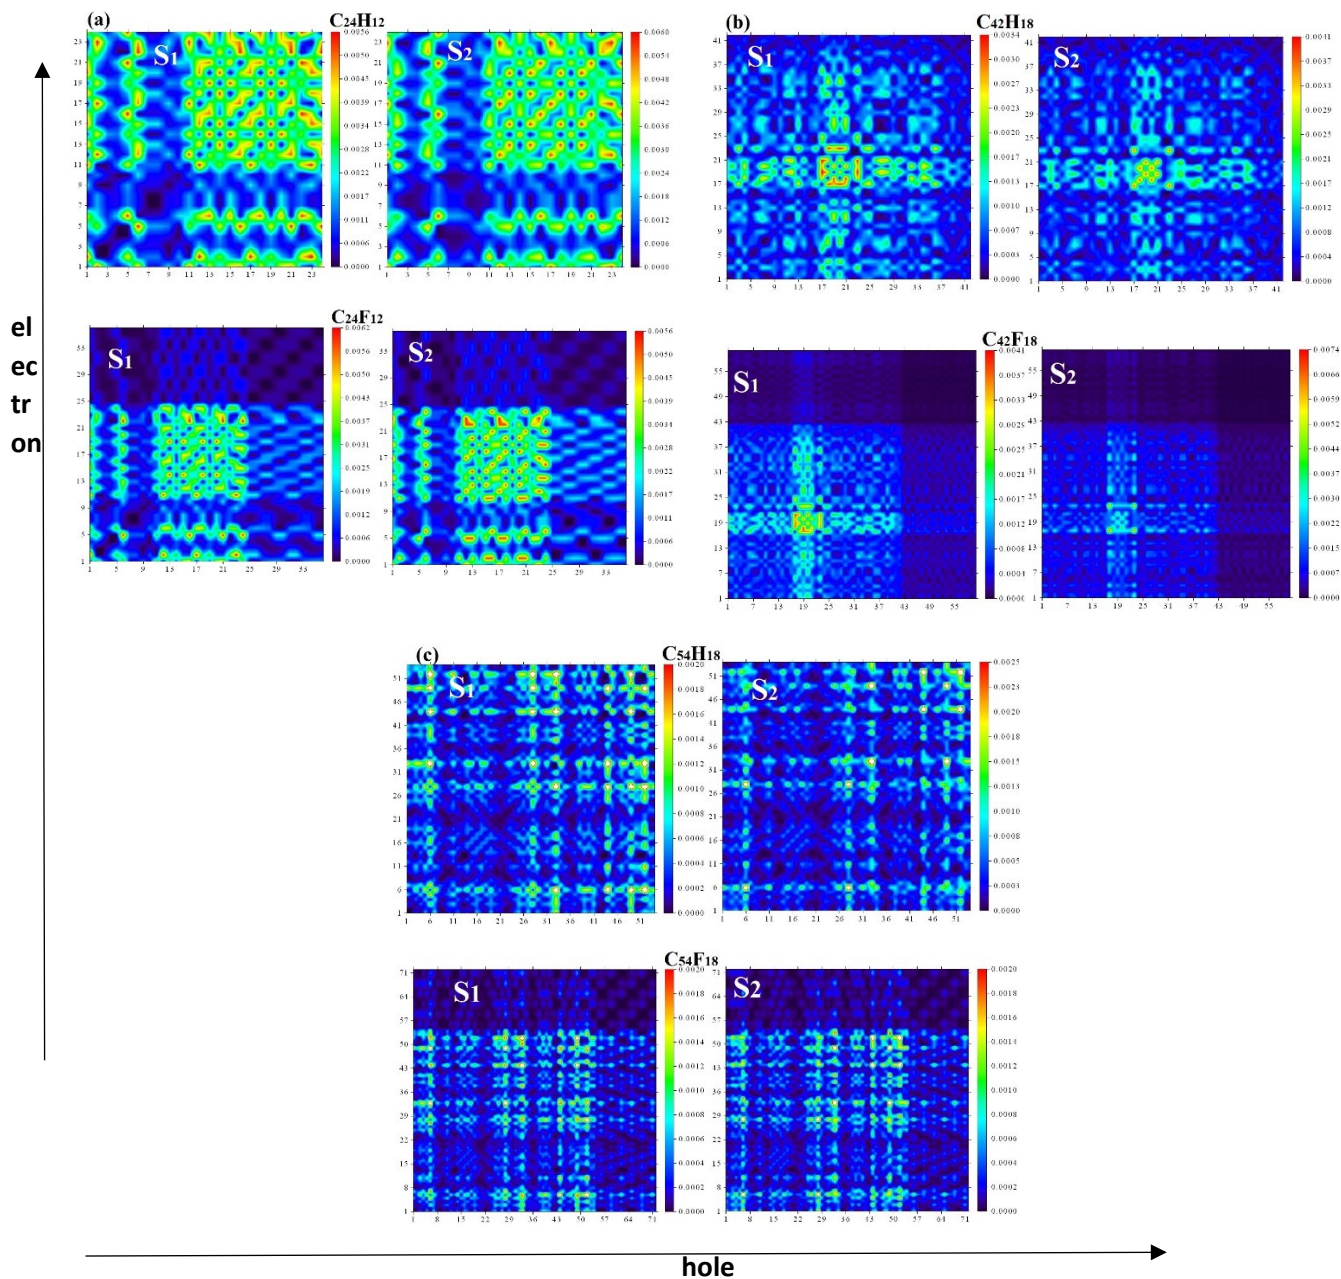

**Fig. S4** Color contour of the transition density matrix of  $S_1$  and  $S_2$  excited states of (a)  $C_{24}$ , (b)  $C_{42}$ , and (c)  $C_{54}$  GQDs passivated with H and F- atoms respectively. The color bar is shown at the right side of each contour.

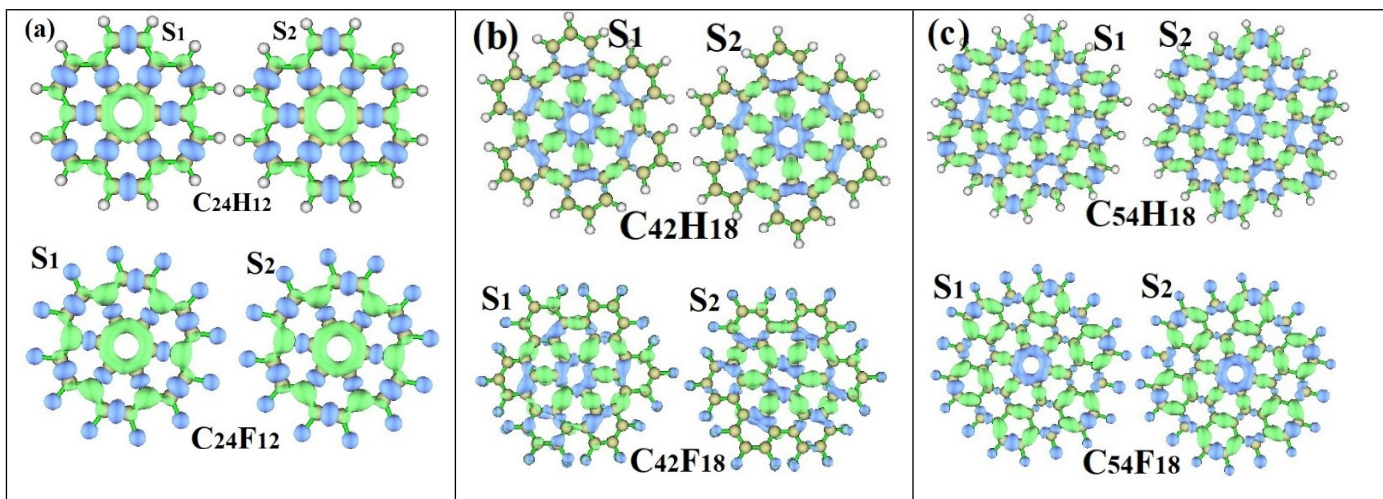

**Fig. 7** Representation of charge difference density between the most probable excited state and ground state for (a) C<sub>24</sub>, (b) C<sub>42</sub>, and (c) C<sub>54</sub> GQDs passivated with h and F-atom. The isosurface value is 0.0004.
